# Supplementary material for: The Impact of Maternal Probiotics on Intestinal Vitamin D Receptor Expression in Early Life
Source: MDPI journal article supplement (doi:10.3390/biom13050847), 2023-05-16
Supplement: s1 [file s1]

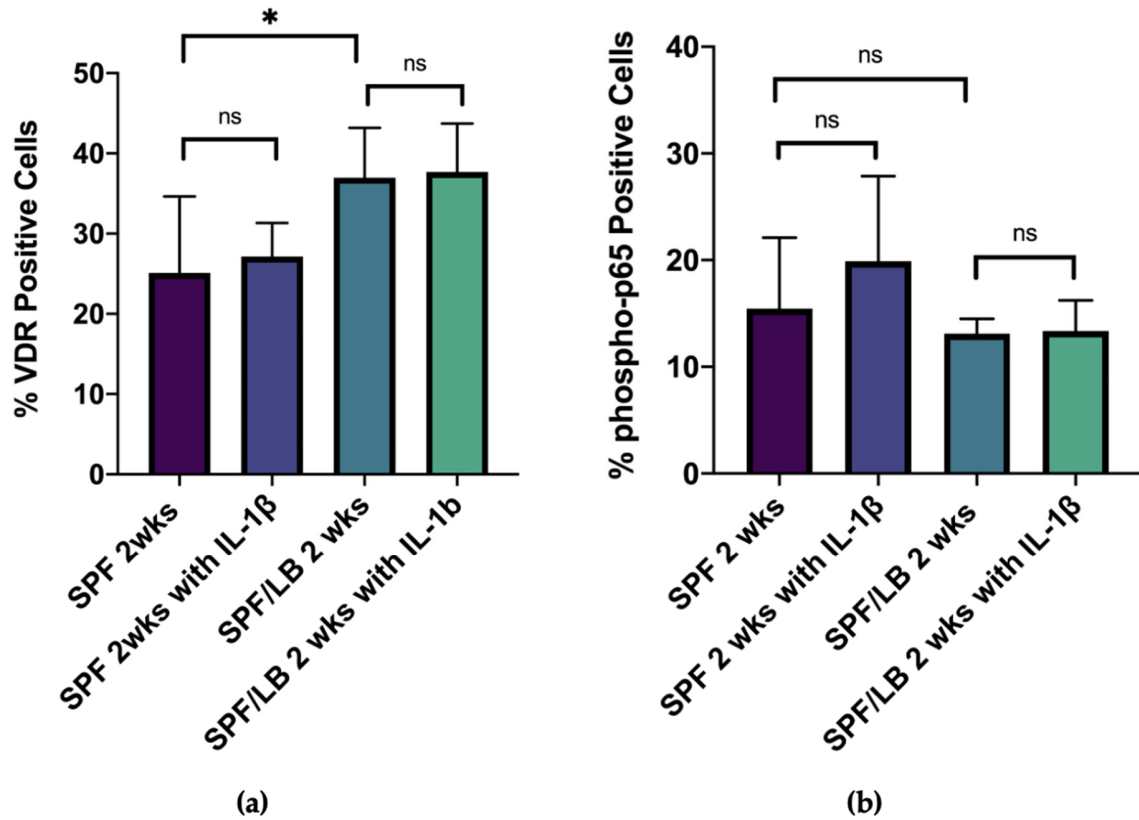

Supplemental Figure S1: (a) colonic VDR expression in: 2-week-old SPF and SPF with IL-1 $\beta$  mice. ns denotes non-significance with p-value = 0.59; 2-week-old SPF/LB and SPF/LB with IL-1 $\beta$  mice. ns denotes non-significance with p-value = 0.83; 2-week-old SPF and SPF/LB mice. \* denotes statistical significance with p-value = 0.01; (b) colonic phospho-p65 expression in: 2-week-old SPF and SPF with IL-1 $\beta$  mice. ns denotes non-significance with p-value 0.24; 2-week-old SPF/LB and SPF/LB with IL-1 $\beta$  mice. ns denotes non-significance with p-value 0.87; 2-week-old SPF and SPF/LB mice. ns denotes non-significance with p-value = 0.40.  $n \geq 3$  for all subgroups
